# Supplementary material for: Job Demands, Work Functioning and Mental Health in Dutch Nursing Home Staff during the COVID-19 Outbreak: A Cross-Sectional Multilevel Study
Source: MDPI journal article supplement (doi:10.3390/ijerph19074379), 2022-04-06
Supplement: s1 [file s1]

**Supplementary Table S1.** Sensitivity analysis care staff ( $n = 1148$ ). Differences between nursing home staff with and without COVID contact, or COVID infection and across different levels of COVID worries in job demands. Reference group: COVID contact (no), COVID infection (no), COVID worries (always).

|                       | Job Demands          |          |                  |                   |          |                 |                     |          |                 |
|-----------------------|----------------------|----------|------------------|-------------------|----------|-----------------|---------------------|----------|-----------------|
|                       | Quantitative Demands |          |                  | Cognitive Demands |          |                 | Emotional Demands   |          |                 |
|                       | B                    | <i>p</i> | 95% CI           | B                 | <i>p</i> | 95% CI          | B                   | <i>p</i> | 95% CI          |
| Intercept             | 56.16 <sup>1</sup>   |          | 52.79 to 59.52   | 64.09             |          | 63.10 to 65.08  | 64.49 <sup>1</sup>  |          | 62.84 to 66.15  |
| COVID contact (no)    | 0                    |          |                  | 0                 |          |                 | 0                   |          |                 |
| COVID contact (yes)   | 2.24 <sup>1</sup>    | 0.062    | -0.11 to 4.60    | 1.42              | 0.168    | -0.60 to 3.45   | 1.98 <sup>1</sup>   | 0.056    | -0.05 to 4.01   |
| COVID infection (no)  | 0                    |          |                  | 0                 |          |                 | 0                   |          |                 |
| COVID infection (yes) | 0.40 <sup>2</sup>    | 0.879    | -5.53 to 6.33    | -0.78             | 0.672    | -4.41 to 2.84   | 3.44 <sup>1</sup>   | 0.060    | -0.15 to 7.03   |
| COVID worries         |                      |          |                  |                   |          |                 |                     |          |                 |
| always (4)            | 0                    |          |                  | 0                 |          |                 | 0                   |          |                 |
| often (3)             | -7.77 <sup>1</sup>   | <0.001   | -12.03 to -3.52  | -10.53            | <0.001   | -14.69 to 6.36  | -11.36 <sup>1</sup> | <0.001   | -15.36 to 7.36  |
| sometimes (2)         | -13.49 <sup>1</sup>  | <0.001   | -17.71 to -9.26  | -14.77            | <0.001   | -18.91 to 10.63 | -17.81 <sup>1</sup> | <0.001   | -21.78 to 13.84 |
| rarely (1)            | -17.13 <sup>1</sup>  | <0.001   | -22.62 to -11.65 | -16.96            | <0.001   | -22.31 to 11.61 | -22.90 <sup>1</sup> | <0.001   | -28.05 to 17.75 |
| never (0)             | -26.20 <sup>1</sup>  | <0.001   | -35.54 to -16.87 | -17.67            | <0.001   | -26.70 to 8.64  | -20.92 <sup>1</sup> | <0.001   | -29.69 to 12.16 |

<sup>1</sup>included random intercepts, <sup>2</sup>included random intercepts and slopes, % missing (range): QD: 6–7%, CD: 6–7%, ED: 6–7%.

**Supplementary Table S2.** Sensitivity analysis care staff ( $n = 1148$ ). Differences between nursing home staff with and without COVID contact or COVID infection and across different levels of COVID worries in work functioning and mental health. Reference group: COVID contact (no), COVID infection (no), COVID worries (always).

|                       | Work Functioning and Mental Health |          |                  |                     |          |                |                    |          |                |
|-----------------------|------------------------------------|----------|------------------|---------------------|----------|----------------|--------------------|----------|----------------|
|                       | Work Functioning                   |          |                  | Depressive Symptoms |          |                | Burnout            |          |                |
|                       | B                                  | <i>p</i> | 95% CI           | B                   | <i>p</i> | 95% CI         | B                  | <i>p</i> | 95% CI         |
| Intercept             | 77.27                              |          | 76.08 to 78.45   | 4.27 <sup>1</sup>   |          | 3.74–4.81      | 2.46 <sup>1</sup>  |          | 2.34 to 2.58   |
| COVID contact (no)    | 0                                  |          |                  | 0                   |          |                | 0                  |          |                |
| COVID contact (yes)   | -0.15                              | 0.900    | -2.56 to 2.25    | 0.30 <sup>1</sup>   | 0.251    | -0.21 to 0.81  | 0.004 <sup>1</sup> | 0.932    | -0.09 to 0.10  |
| COVID infection (no)  | 0                                  |          |                  | 0                   |          |                | 0                  |          |                |
| COVID infection (yes) | -4.48                              | 0.046    | -(8.87 to -0.08) | 1.73 <sup>1</sup>   | <0.001   | 0.84 to 2.61   | 0.32 <sup>1</sup>  | <0.001   | 0.15 to 0.49   |
| COVID worries         |                                    |          |                  |                     |          |                |                    |          |                |
| always (4)            | 0                                  |          |                  | 0                   |          |                | 0                  |          |                |
| often (3)             | 7.32                               | 0.005    | 2.23 to 12.42    | 3.19 <sup>1</sup>   | <0.001   | -4.22 to -2.17 | -0.44 <sup>1</sup> | <0.001   | -0.63 to -0.24 |
| sometimes (2)         | 12.87                              | <0.001   | 7.80 to 17.94    | -4.94 <sup>1</sup>  | <0.001   | -5.96 to -3.92 | -0.72 <sup>1</sup> | <0.001   | -0.91 to -0.52 |
| rarely (1)            | 15.53                              | <0.001   | 9.07 to 21.99    | -4.90 <sup>1</sup>  | <0.001   | -6.20 to -3.59 | -0.86 <sup>1</sup> | <0.001   | -1.11 to -0.61 |
| never (0)             | 12.54                              | 0.025    | 1.62 to 23.46    | -5.18 <sup>1</sup>  | <0.001   | -7.36 to -2.99 | -0.69 <sup>1</sup> | 0.001    | -1.10 to -0.28 |

<sup>1</sup>included random intercepts, % missing (range): WF: 25–26%, DS: 19–20%, BO: 11–12%.
